# Supplementary material for: A novel role for protein tyrosine phosphatase 1B as a positive regulator of neuroinflammation
Source: PubMed Central journal article supplement (PMC4837589; doi:10.1186/s12974-016-0545-3), 2016-04-19

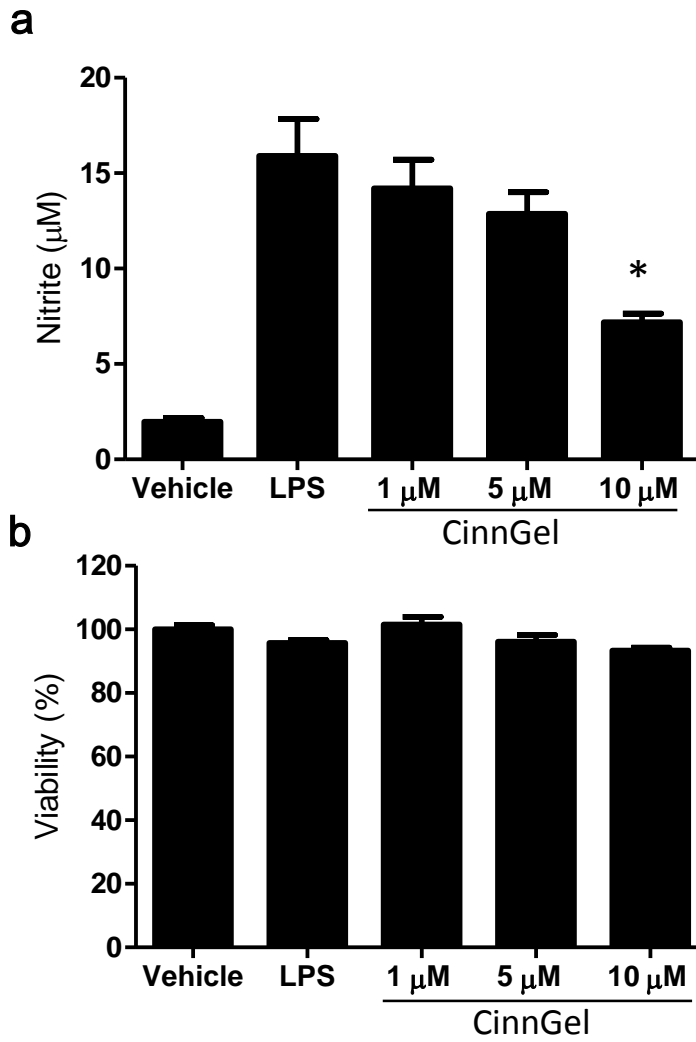

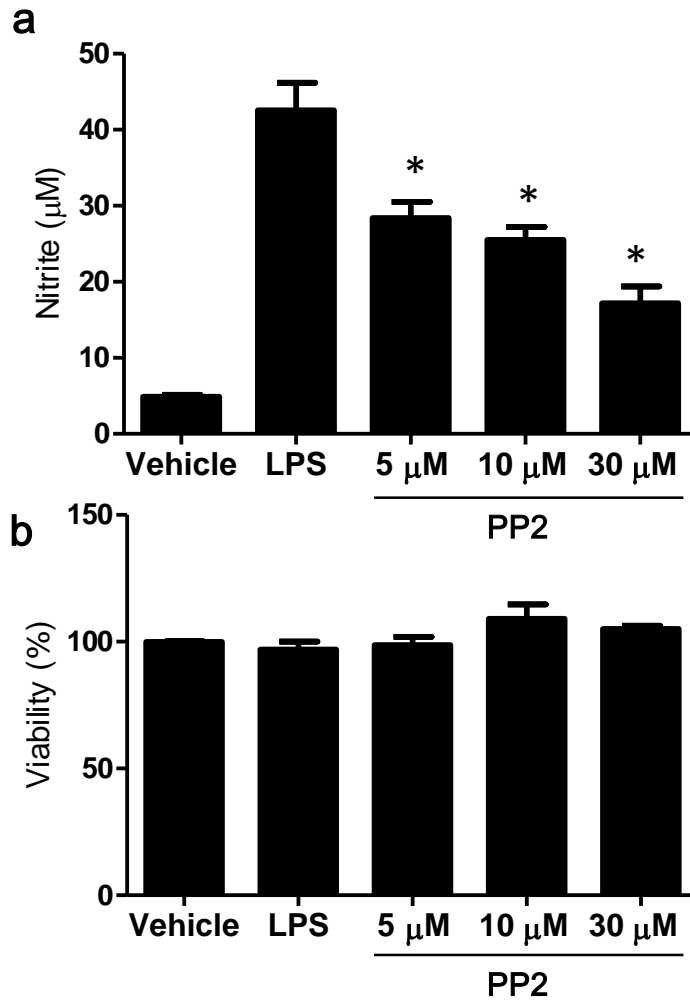

Supplement: 12974_2016_545_MOESM1_ESM.pdf [file 12974_2016_545_MOESM1_ESM.pdf]
